# Supplementary material
Source: publisher site journal article supplement (https://www.dovepress.com/article/548950)
Supplement: Supplementary file 1 [file 548950%20%252509Supplementary%20file%201..docx]

**Supplementary table 1. Search Strategy**

| **Databased** | **Keywords** | **Results** |
| --- | --- | --- |
| PubMed | (((nurse led intervention) OR (nursing intervention)) AND ((((multicomorbidity) OR (comorbidities)) OR (multiple chronic condition)) OR (polimorbidity))) AND ((aged[MeSH Terms] OR (older adult[MeSH Terms]) OR (elderly[MeSH Terms])) | 240 |
| CINAHL | (nursing interventions or nursing care) OR (nurse led or nurse-led or nurse managed or nurse delivered or nurse based or nurse) AND (older adults or elderly or geriatric or geriatrics or aging or senior or seniors or older people or aged 65 or 65+) AND (comorbidities or comorbidity or multimoribidities) AND (RCT or Quasi Experiment) | 4.156 |
| ScienceDirect | (((nurse led intervention) OR (nursing intervention)) AND ((((multicomorbidity) OR (comorbidities)) OR (multiple chronic condition)) OR (polimorbidity))) AND ((aged[MeSH Terms] OR (older adult[MeSH Terms]) OR (elderly[MeSH Terms])) | 751 |
| Scopus | nursing intervention OR nurse led intervention OR nursing care OR nursing delivery AND aged OR older adults OR elderly AND comorbidities OR multicomorbidity OR polimorbidity | 406 |
| Taylor & Francis | (((nurse led intervention) OR (nursing intervention)) AND ((((multicomorbidity) OR (comorbidities)) OR (multiple chronic condition)) OR (polimorbidity))) AND ((aged[MeSH Terms] OR (older adult[MeSH Terms]) OR (elderly[MeSH Terms])) | 565 |
